# Supplementary material
Source: publisher site journal article supplement (https://www.spandidos-publications.com/2097/downloadSupplementary)

Figure S1. The GFP expression levels in the cardiac injection (n=4) and tail-vein injection groups (n=4) were detected by fluorescence microscopy. GFP expression was detected on day 5 after viral injection. The number of GFP-positive cells is presented as a percentage of the total cell population. \*\*P<0.01 vs. vein.

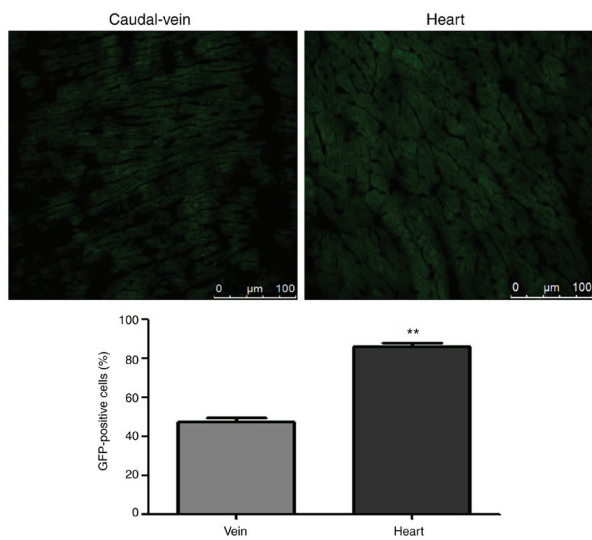

Supplement: Supplementary file 1 [file downloadSupplementary]
